# Supplementary material
Source: Royal Society of Chemistry journal article supplement (doi:10.1039/d5mr00101c)
Supplement: d5mr00101c1.pdf [file d5mr00101c1.pdf]

## Supporting Information

# Upgrading coal tar products into hypercrosslinked polymers by mechanosynthesis

*A.M. Borrero-López<sup>1,2</sup>, J. Castro-Gutiérrez<sup>1,\*</sup>, E. Derveaux,<sup>3,4</sup> W. Marchal<sup>3,4</sup>, A. Celzard<sup>1,5</sup>,  
V. Fierro<sup>1,\*</sup>*

<sup>1</sup> *Université de Lorraine, CNRS, Institut Jean Lamour (IJL), F-88000 Epinal, France*

<sup>2</sup> *Pro2TecS – Chemical Process and Product Technology Research Centre. Dept. Chemical Engineering, ETSI.  
Campus de “El Carmen”. Universidad de Huelva. 21071 Huelva. Spain*

<sup>3</sup> *Hasselt University, Institute for Materials Research (IUMAT), Metabolomics and Advanced Solid state NMR  
group (MAS-NMR), Martelarenlaan 42, B-3500 Hasselt, Belgium*

<sup>4</sup> *imec, IUMAT, Wetenschapspark 1, B-3590 Diepenbeek, Belgium*

<sup>5</sup> *Institut Universitaire de France (IUF), F-75231, Paris, France*

**Table S1.** Main components of distilled coal tar pitch (DCTP).

| Distilled coal tar pitch |                                                           |
|--------------------------|-----------------------------------------------------------|
| Abundance (wt.%)         | Compound                                                  |
| 18.26                    | Acenaphthene                                              |
| 10.50                    | Anthracene                                                |
| 8.35                     | Indane                                                    |
| 7.21                     | Fluoranthene                                              |
| 4.74                     | Pyrene                                                    |
| 3.00                     | Naphthalene                                               |
| 2.76                     | Fluorene                                                  |
| 2.53                     | 1H-Benzo[b]fluorene                                       |
| 2.45                     | Naphthalene, 2-methyl-                                    |
| 1.99                     | Naphthalene, 1-phenyl-                                    |
| 1.96                     | Triphenylene                                              |
| 1.75                     | Phenanthrene, 2-methyl-                                   |
| 1.74                     | Benzene, [1-(2,4-cyclopentadien-1-ylidene)ethyl]-         |
| 1.62                     | 5H-Indeno[1,2-b]pyridine                                  |
| 1.45                     | 4H-Cyclopenta[def]phenanthrene                            |
| 1.44                     | Benz[a]anthracene                                         |
| 1.40                     | 1,1'-Biphenyl, 4-methyl-                                  |
| 1.16                     | Pyrene, 1-methyl-                                         |
| 1.11                     | Naphthalene, 1-methyl-                                    |
| 1.02                     | Benzo[b]fluoranthene                                      |
| 0.98                     | Naphthalene, 2-ethyl-                                     |
| 0.94                     | 1,1'-Biphenyl, 2-methyl-                                  |
| 0.90                     | Anthracene, 1,2,3,4-tetrahydro-                           |
| 0.83                     | Dibenzofuran                                              |
| 0.81                     | Naphthalene, 2,7-dimethyl-                                |
| 0.80                     | Ethylbenzene                                              |
| 0.71                     | Benzene, (2-methyl-1-propenyl)-                           |
| 0.70                     | Benzene, 1-ethyl-3-methyl-                                |
| 0.69                     | Benzene, 2-ethenyl-1,4-dimethyl-                          |
| 0.69                     | 9H-Fluorene, 2-methyl-                                    |
| 0.67                     | Dibenzofuran, 4-methyl-                                   |
| 0.67                     | Naphtho[2,1-b]thiophene                                   |
| 0.66                     | Anthracene, 9,10-dihydro-                                 |
| 0.65                     | 1,2,3,4-Tetrahydro-1-phenyl-1,2,3-methanonaphthalene      |
| 0.61                     | o-Xylene                                                  |
| 0.51                     | Cyclopenta(cd)pyrene, 3,4-dihydro-                        |
| 0.51                     | o-Terphenyl                                               |
| 0.49                     | Acenaphthylene, 1,2,2a,3,4,5-hexahydro-                   |
| 0.48                     | p-Xylene                                                  |
| 0.46                     | 1H-Indene, 2,3-dihydro-5-methyl-                          |
| 0.46                     | 1,2,4,8-Tetramethylbicyclo[6.3.0]undeca-2,4-diene         |
| 0.41                     | Benzo[b]naphtho[2,1-d]thiophene                           |
| 0.40                     | Anthracene, 1-methyl-                                     |
| 0.40                     | 4-Carbomethoxy-3-methoxy-4-methyl-2,5-cyclohexadien-1-one |
| 0.39                     | Benzene, 2-butenyl-                                       |
| 0.38                     | Benzo[ghi]fluoranthene                                    |
| 0.38                     | 4-O-Methoxyphenylhydrazono-3-methyl-2-pyrazolin-5-one     |
| 0.35                     | Benzene, 1-ethyl-3,5-dimethyl-                            |
| 0.34                     | Phenanthrene, 1,2-dihydro-                                |
| 0.33                     | Pyrene, 1,3-dimethyl-                                     |
| 0.32                     | Benzo[e]pyrene                                            |
| 0.31                     | Benzo[b]naphtho[2,1-d]furan                               |
| 0.29                     | Benzo(c)carbazole                                         |
| 0.29                     | Perylene                                                  |
| 0.25                     | 4,4'-Bis(tetrahydrothiopyran)                             |
| 0.24                     | 4H-Benzo[def]carbazole                                    |

**Table S1 (continued).** Main components of distilled coal tar pitch (DCTP).

| <b>Distilled coal tar pitch</b> |                                                        |
|---------------------------------|--------------------------------------------------------|
| <b>Abundance (wt.%)</b>         | <b>Compound</b>                                        |
| 0.23                            | Naphthacene, 5,12-dihydro-                             |
| 0.23                            | Naphthalene, 2,6-dimethyl-                             |
| 0.22                            | 1,8-Anthracenediamine                                  |
| 0.22                            | 11H-Benzo[a]carbazole                                  |
| 0.22                            | Indeno[2,1-b]chromene,                                 |
| 0.20                            | Acridine, 9,10-dihydro-                                |
| 0.20                            | Benzene, 1,2,4-trimethyl-                              |
| 0.20                            | 9H-Fluorene, 9-methyl-                                 |
| 0.20                            | Phenanthrene, 3,6-dimethyl-                            |
| 0.20                            | Triphenylene, 2-methyl-                                |
| 0.19                            | Benzo[g]quinoline                                      |
| 0.19                            | Naphthalene, 1-ethyl-                                  |
| 0.19                            | Phenanthrene, 2,5-dimethyl-                            |
| 0.18                            | Naphthalene, 2,3,6-trimethyl-                          |
| 0.17                            | Hydrazinecarboxamide, 2-(2,6-dimethylcyclohexylidene)- |
| 0.17                            | Naphthalene, 1,7-dimethyl-                             |
| 0.17                            | Naphthalene, 2,3-dimethyl-                             |
| 0.16                            | Anthracene, 2-ethyl-                                   |
| 0.16                            | Benzene, 1,2,3-trimethyl-                              |
| 0.14                            | Naphthalene, 1,2,3,4-tetrahydro-                       |
| 0.13                            | o-Toluidine                                            |
| 0.12                            | Benzo[b]naphtho[2,3-d]furan                            |
| 0.11                            | Benzene, cyclopentyl                                   |
| 0.06                            | Cyclohexane, hexaethylidene- (ISOMER 2)                |

**Table S2.** Main components of depleted naphthalene oil (DNO).

| <b>Depleted Naphthalene oil</b> |                               |
|---------------------------------|-------------------------------|
| <b>Abundance (wt.%)</b>         | <b>Compound</b>               |
| 50.42                           | Naphthalene                   |
| 26.02                           | Naphthalene, 2-methyl-        |
| 7.35                            | Naphthalene, 1-methyl-        |
| 4.31                            | Quinoline                     |
| 4.13                            | Benzo[b]thiophene             |
| 1.87                            | 1-Methyl-2-phenylcyclopropane |
| 1.13                            | Biphenyl                      |
| 1.12                            | Indane                        |
| 1.03                            | Phenol, 3,5-dimethyl-         |
| 0.78                            | 3-Phenyl-1-propyne            |
| 0.67                            | p-Cresol                      |
| 0.66                            | Quinoline                     |
| 0.50                            | Benzene, 1-butyryl-           |

**Table S3.** Main components of wash oil.

| <b>Wash oil</b>         |                                                           |
|-------------------------|-----------------------------------------------------------|
| <b>Abundance (wt.%)</b> | <b>Compound</b>                                           |
| 21.67                   | Acenaphthene                                              |
| 16.11                   | Fluorene                                                  |
| 12.16                   | Dibenzofuran                                              |
| 10.40                   | Naphthalene                                               |
| 6.61                    | Naphthalene, 1-methyl-                                    |
| 4.07                    | Biphenyl                                                  |
| 3.62                    | Naphthalene, 2-methyl-                                    |
| 3.61                    | Dibenzofuran, 4-methyl-                                   |
| 2.39                    | Naphthalene, 2,7-dimethyl-                                |
| 1.97                    | Anthracene                                                |
| 1.97                    | Diphenylmethane                                           |
| 1.81                    | 1-Isopropenylnaphthalene                                  |
| 1.64                    | 1,1'-Biphenyl, 4-methyl-                                  |
| 1.24                    | Naphthalene, 2-ethyl-                                     |
| 1.20                    | Naphthalene, 1,6,7-trimethyl-                             |
| 1.01                    | Naphthalene, 2,3-dimethyl-                                |
| 0.73                    | Quinoline                                                 |
| 0.64                    | Naphthalene, 2,3,6-trimethyl-                             |
| 0.59                    | 9H-Fluorene, 2-methyl-                                    |
| 0.43                    | 1-Naphthalenecarbonitrile                                 |
| 0.42                    | Naphthalene, 1,4,6-trimethyl-                             |
| 0.35                    | Anthracene, 9,10-dihydro-                                 |
| 0.35                    | Naphthalene, 2,6-dimethyl-                                |
| 0.28                    | Dibenzothiophene                                          |
| 0.28                    | Quinoline, 8-methyl-                                      |
| 0.25                    | Naphthalene, 1-ethyl-                                     |
| 0.24                    | Benzo[b]thiophene                                         |
| 0.20                    | Biphenylene                                               |
| 0.16                    | 5-Methyl-5H-dibenzo[b,d]silole                            |
| 0.12                    | 4-Carbomethoxy-3-methoxy-4-methyl-2,5-cyclohexadien-1-one |
| 0.11                    | 1,1'-Biphenyl, 2-methyl-                                  |
| 0.10                    | 1-Ethynyl-2-(methylsulfanyl)benzene                       |

**Table S4.** Main components of naphthalene oil.

| <b>Naphthalene oil</b>  |                        |
|-------------------------|------------------------|
| <b>Abundance (wt.%)</b> | <b>Compound</b>        |
| 87.40                   | Naphthalene            |
| 8.37                    | Naphthalene, 1-methyl- |
| 2.67                    | Naphthalene, 2-methyl- |
| 1.56                    | Cyclopenta[b]thiopyran |

**Table S5.** Main components of chrysene oil.

| <b>Chrysene oil</b>     |                                         |
|-------------------------|-----------------------------------------|
| <b>Abundance (wt.%)</b> | <b>Compound</b>                         |
| 17.60                   | Fluoranthene                            |
| 14.64                   | Pyrene                                  |
| 11.59                   | Anthracene                              |
| 9.56                    | Triphenylene                            |
| 6.18                    | 1H-Benzo[a]fluorene                     |
| 5.43                    | Benzo[b]fluoranthene                    |
| 2.13                    | 4H-Cyclopenta[def]phenanthrene          |
| 2.11                    | Pyrene, 1-methyl-                       |
| 1.96                    | 5H-Indeno[1,2-b]pyridine                |
| 1.50                    | Cyclopenta(cd)pyrene, 3,4-dihydro-      |
| 1.44                    | Phenanthrene, 2-methyl-                 |
| 1.42                    | Naphthalene                             |
| 1.37                    | Pyrene, 1,3-dimethyl-                   |
| 1.15                    | Cyclopenta[cd]pyrene                    |
| 1.13                    | Benzo[a]pyrene                          |
| 1.10                    | Benzo[b]naphtho[2,3-d]furan             |
| 1.05                    | Benzo[b]naphtho[2,1-d]thiophene         |
| 1.01                    | Fluorene                                |
| 0.91                    | 1H-Benzo[a]carbazole                    |
| 0.87                    | 4H-Benz[de]anthracene, 5,6-dihydro-     |
| 0.78                    | Naphthalene, 1-phenyl-                  |
| 0.76                    | Acenaphthene                            |
| 0.73                    | 2-Phenylnaphthalene                     |
| 0.70                    | 9-(Cyanomethylene)fluorene              |
| 0.69                    | Benzo[c]acridine                        |
| 0.69                    | 9H-Cyclopenta[a]pyrene                  |
| 0.67                    | 4H-Benzo[def]carbazole                  |
| 0.66                    | Benzo(c)carbazole                       |
| 0.57                    | Benz[a]anthracene, 1-methyl-            |
| 0.56                    | 5-Bromothiophene-2-carboxylic acid      |
| 0.54                    | Anthracene, 1-methyl-                   |
| 0.52                    | Benzo[ghi]perylene                      |
| 0.52                    | Phenanthrene, 1-methyl-                 |
| 0.49                    | Dibenzothiophene                        |
| 0.48                    | Anthra(1,2-b)thiophene                  |
| 0.48                    | Benzo[e]pyrene                          |
| 0.46                    | 9-Anthracenecarbonitrile                |
| 0.46                    | Dibenzofuran                            |
| 0.45                    | Cyclohexane, hexaethylidene- (ISOMER 2) |
| 0.45                    | Naphthacene, 5,12-dihydro-              |
| 0.40                    | 9H-Carbazole, 2-methyl-                 |
| 0.34                    | Acridine                                |
| 0.34                    | Phenanthrene, 3,6-dimethyl-             |
| 0.29                    | Indeno[2,1-b]chromene,                  |
| 0.25                    | Chrysene, 1-methyl-                     |
| 0.24                    | Chrysene, 6-methyl-                     |
| 0.24                    | 8,9-Dihydro-7H-cyclopenta[a]pyrene      |

**Table S5 (continued).** Main components of chrysene oil.

| <b>Chrysene oil</b>     |                                                                        |
|-------------------------|------------------------------------------------------------------------|
| <b>Abundance (wt.%)</b> | <b>Compound</b>                                                        |
| 0.23                    | Naphthalene, 1,8-di-1-propynyl-                                        |
| 0.23                    | Phenanthrene, 2,5-dimethyl-                                            |
| 0.22                    | Acridine, 9,10-dihydro-                                                |
| 0.22                    | 1,4-Ethenoanthracene, 1,4-dihydro-                                     |
| 0.21                    | di-p-Tolylacetylene                                                    |
| 0.18                    | 7-Isopropenyl-1,4a-dimethyl-4,4a,5,6,7,8-hexahydro-3H-naphthalen-2-one |
| 0.18                    | Anthracene, 2-ethyl-                                                   |
| 0.18                    | Dinaphtho[1,2-b:1',2'-d]furan                                          |
| 0.15                    | Benzo[f]isoquinoline                                                   |
| 0.15                    | Phenanthrene, 4,5-dimethyl-                                            |
| 0.14                    | Anthranilic acid, 2TMS derivative                                      |

**Table S6.** Main components of phenolic oil.

| <b>Phenolic oil</b>     |                                  |
|-------------------------|----------------------------------|
| <b>Abundance (wt.%)</b> | <b>Compound</b>                  |
| 23.32                   | Indane                           |
| 15.40                   | Naphthalene                      |
| 13.34                   | Indene                           |
| 9.59                    | Phenol                           |
| 6.67                    | p-Cresol                         |
| 5.94                    | p-Xylene                         |
| 3.49                    | Phenol, 2-methyl-                |
| 2.93                    | Benzene, 1,2,3-trimethyl-        |
| 2.46                    | Benzene, 1-ethyl-3-methyl-       |
| 2.44                    | Mesitylene                       |
| 2.02                    | Benzene, 1,3-dimethyl-           |
| 2.00                    | Benzofuran                       |
| 1.70                    | Ethylbenzene                     |
| 1.27                    | Benzene, (2-methyl-2-propenyl)-  |
| 1.05                    | Benzene, 1-ethyl-2,3-dimethyl-   |
| 0.99                    | Aniline                          |
| 0.94                    | Benzene, 2-ethenyl-1,4-dimethyl- |
| 0.92                    | Cinnamaldehyde, (E)-             |
| 0.79                    | Mesitylene                       |
| 0.72                    | Benzene, 1-ethenyl-4-ethyl-      |
| 0.46                    | Benzofuran, 2-methyl-            |
| 0.45                    | Pyridine, 3,4-dimethyl-          |
| 0.41                    | Benzofuran, 2-methyl-            |
| 0.22                    | Benzene, 1,2,3,4-tetramethyl-    |
| 0.19                    | Benzene, 4-ethyl-1,2-dimethyl-   |
| 0.18                    | Benzene, (1-methylethyl)-        |
| 0.10                    | Benzo[b]thiophene                |

**Table S7.** Main components of creosote.

| <b>Creosote</b>         |                                                           |
|-------------------------|-----------------------------------------------------------|
| <b>Abundance (wt.%)</b> | <b>Compound</b>                                           |
| 21.65                   | Anthracene                                                |
| 13.22                   | Acenaphthene                                              |
| 8.64                    | Naphthalene                                               |
| 7.12                    | Fluorene                                                  |
| 6.32                    | Dibenzofuran                                              |
| 4.09                    | Naphthalene, 1-methyl-                                    |
| 3.24                    | Fluoranthene                                              |
| 3.20                    | Dibenzofuran, 4-methyl-                                   |
| 2.92                    | Phenanthrene, 2-methyl-                                   |
| 2.57                    | 4H-Cyclopenta[def]phenanthrene                            |
| 2.30                    | Dibenzothiophene                                          |
| 2.28                    | Naphthalene, 2-methyl-                                    |
| 2.16                    | Naphthalene, 2,7-dimethyl-                                |
| 2.00                    | Biphenyl                                                  |
| 1.87                    | 9H-Fluorene, 2-methyl-                                    |
| 1.44                    | Phenanthrene                                              |
| 1.36                    | Diphenylmethane                                           |
| 1.08                    | Indane                                                    |
| 1.05                    | 1-Isopropenylnaphthalene                                  |
| 1.05                    | Pyrene                                                    |
| 0.78                    | Naphthalene, 2-phenyl-                                    |
| 0.67                    | 5H-Indeno[1,2-b]pyridine                                  |
| 0.67                    | Naphthalene, 1,4-dimethyl-                                |
| 0.63                    | Dibenzo[a,e]cyclooctene                                   |
| 0.61                    | Naphthalene, 2-ethyl-                                     |
| 0.59                    | Naphthalene, 1,6,7-trimethyl-                             |
| 0.57                    | 1,1'-Biphenyl, 3-methyl-                                  |
| 0.55                    | Acridine                                                  |
| 0.52                    | Anthracene, 9,10-dihydro-                                 |
| 0.51                    | 8-Dimethylaminonaphthalene-1-carbonitrile                 |
| 0.47                    | Benzo[f]isoquinoline                                      |
| 0.39                    | Acridine, 9,10-dihydro-                                   |
| 0.38                    | Phenanthrene, 1-methyl-                                   |
| 0.38                    | Quinoline                                                 |
| 0.36                    | Benzo[b]naphtho[2,3-d]furan                               |
| 0.36                    | 4-Carbomethoxy-3-methoxy-4-methyl-2,5-cyclohexadien-1-one |
| 0.36                    | Naphthalene, 2,3,6-trimethyl-                             |
| 0.34                    | 1,1'-Biphenyl, 4-methyl-                                  |
| 0.33                    | Naphthalene, 2,3-dimethyl-                                |
| 0.31                    | 1-Naphthalenecarbonitrile                                 |
| 0.24                    | Naphthalene, 1,5-dimethyl-                                |
| 0.14                    | Anthracene, 1,2,3,4-tetrahydro-9,10-dimethyl-             |
| 0.14                    | Phenanthrene, 1,2-dihydro-                                |
| 0.12                    | Naphthalene, 1,4,6-trimethyl-                             |

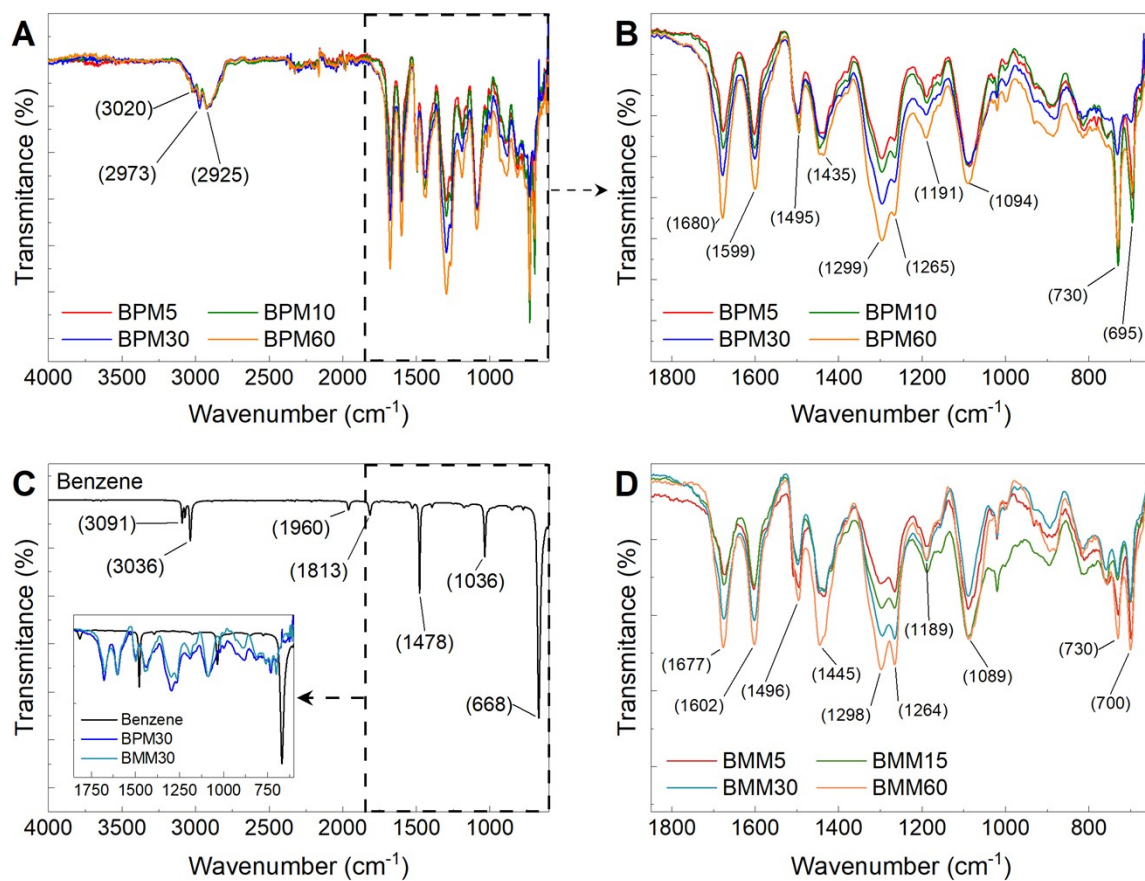

**Figure S1.** (A) FTIR spectra of benzene-derived HCPs at different reaction times prepared using a planetary mill (BPM $t$ ), (B) zoom in on the 2000 – 600 cm<sup>-1</sup> range to better observe the differences discussed. (C) FTIR spectrum of benzene. (D) FTIR spectra in the 2000 – 600 cm<sup>-1</sup> range of benzene-derived HCPs formulated at different reaction times using a mixer mill (BMM $t$ ). The inset in (C) compares the spectrum of the pristine benzene molecule to those of samples BPM30 and BMM30.

**Table S8.** TG analysis of benzene-derived HCPs obtained using a planetary mill and a mixer mill, BPM $t$ , and BMM $t$ , respectively, where  $t$  stands for the milling time in minutes. Each thermal event is identified by its onset and end temperature ( $T_{\text{onset}}$  and  $T_{\text{end}}$ , respectively), as well as by the temperature at which maximum mass loss occurs during the corresponding event ( $T_{\text{max}}$ ). The total mass loss at each thermal event and the final residue at 900 °C are also reported ( $-\Delta M$  and  $R_{900}$ , respectively).

| Sample | $T_{\text{center}}$<br>(°C) | $T_{\text{onset}}$<br>(°C) | $T_{\text{end}}$<br>(°C) | $-\Delta M$<br>(wt.%) | $R_{900}$<br>(wt.%)* |
|--------|-----------------------------|----------------------------|--------------------------|-----------------------|----------------------|
| BPM3   | 315                         | 214                        | 377                      | 9                     | 68                   |
|        | 485                         | 377                        | 493                      | 7                     |                      |
|        | 540                         | 493                        | 900                      | 16                    |                      |
| BPM5   | 297                         | 237                        | 373                      | 9                     | 71                   |
|        | 477                         | 373                        | 481                      | 5                     |                      |
|        | 539                         | 481                        | 900                      | 15                    |                      |
| BPM10  | 305                         | 243                        | 381                      | 11                    | 72                   |
|        | 479                         | 381                        | 511                      | 7                     |                      |
|        | 553                         | 511                        | 900                      | 10                    |                      |
| BPM15  | 312                         | 216                        | 380                      | 9                     | 71                   |
|        | 481                         | 380                        | 500                      | 7                     |                      |
|        | 548                         | 500                        | 900                      | 13                    |                      |
| BPM20  | 324                         | 225                        | 388                      | 11                    | 68                   |
|        | 489                         | 388                        | 517                      | 9                     |                      |
|        | 551                         | 517                        | 900                      | 12                    |                      |
| BPM30  | 323                         | 235                        | 389                      | 12                    | 70                   |
|        | 486                         | 389                        | 517                      | 8                     |                      |
|        | 546                         | 517                        | 900                      | 10                    |                      |
| BPM60  | 327                         | 252                        | 391                      | 12                    | 68                   |
|        | 498                         | 391                        | 525                      | 10                    |                      |
|        | 547                         | 525                        | 900                      | 10                    |                      |
| BMM5   | 243                         | 203                        | 365                      | 9                     | 61                   |
|        | 520                         | 365                        | 900                      | 30                    |                      |
| BMM15  | 243                         | 202                        | 254                      | 2                     | 68                   |
|        | 296                         | 254                        | 376                      | 9                     |                      |
|        | 544                         | 376                        | 900                      | 21                    |                      |
| BMM30  | 239                         | 206                        | 247                      | 2                     | 69                   |
|        | 285                         | 247                        | 378                      | 10                    |                      |
|        | 460                         | 378                        | 494                      | 6                     |                      |
|        | 551                         | 494                        | 900                      | 13                    |                      |

\* Residual weight fraction at 900 °C from TG analysis in inert atmosphere.

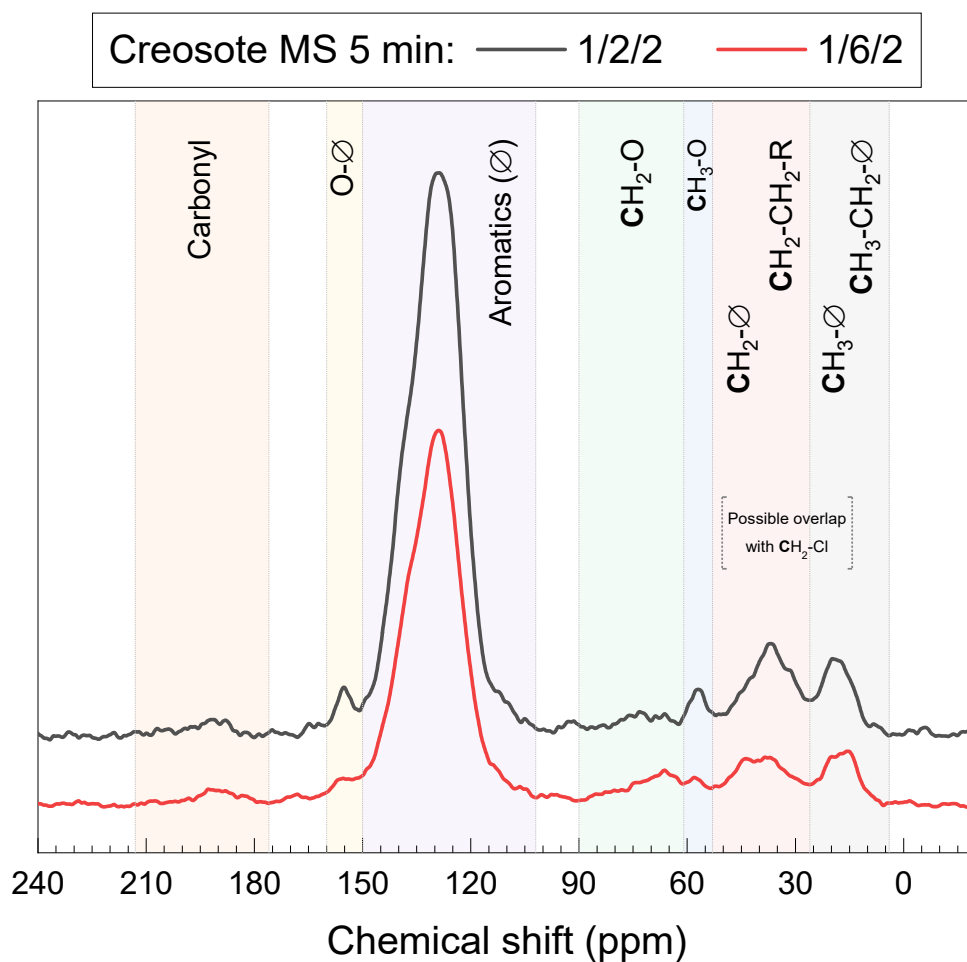

**Figure S2.**  $^{13}\text{C}$  MAS solid-state NMR spectra for creosote-derived HCPs obtained using a 1/2/2 and 1/6/2 precursor/catalyst/crosslinker molar ratio and a reaction time of 5 min.

**Table S9.**  $^{13}\text{C}$  MAS solid-state NMR signals and contributions for creosote MS 5 min 1/2/2 and 1/6/2 samples.

| Signal                                                   | Contribution (%)        |                         |
|----------------------------------------------------------|-------------------------|-------------------------|
|                                                          | Creosote MS 5 min 1/2/2 | Creosote MS 5 min 1/6/2 |
| Carbonyl                                                 | 1.50                    | 2.73                    |
| O-∅                                                      | 2.19                    | 1.30                    |
| Aromatics (∅)                                            | 74.65                   | 70.12                   |
| CH <sub>2</sub> -O                                       | 2.91                    | 5.70                    |
| CH <sub>3</sub> -O                                       | 2.34                    | 1.88                    |
| CH <sub>2</sub> -∅ + CH <sub>2</sub> -CH <sub>2</sub> -R | 9.78                    | 9.30                    |
| CH <sub>3</sub> -∅ + CH <sub>3</sub> -CH <sub>2</sub> -∅ | 6.06                    | 6.48                    |

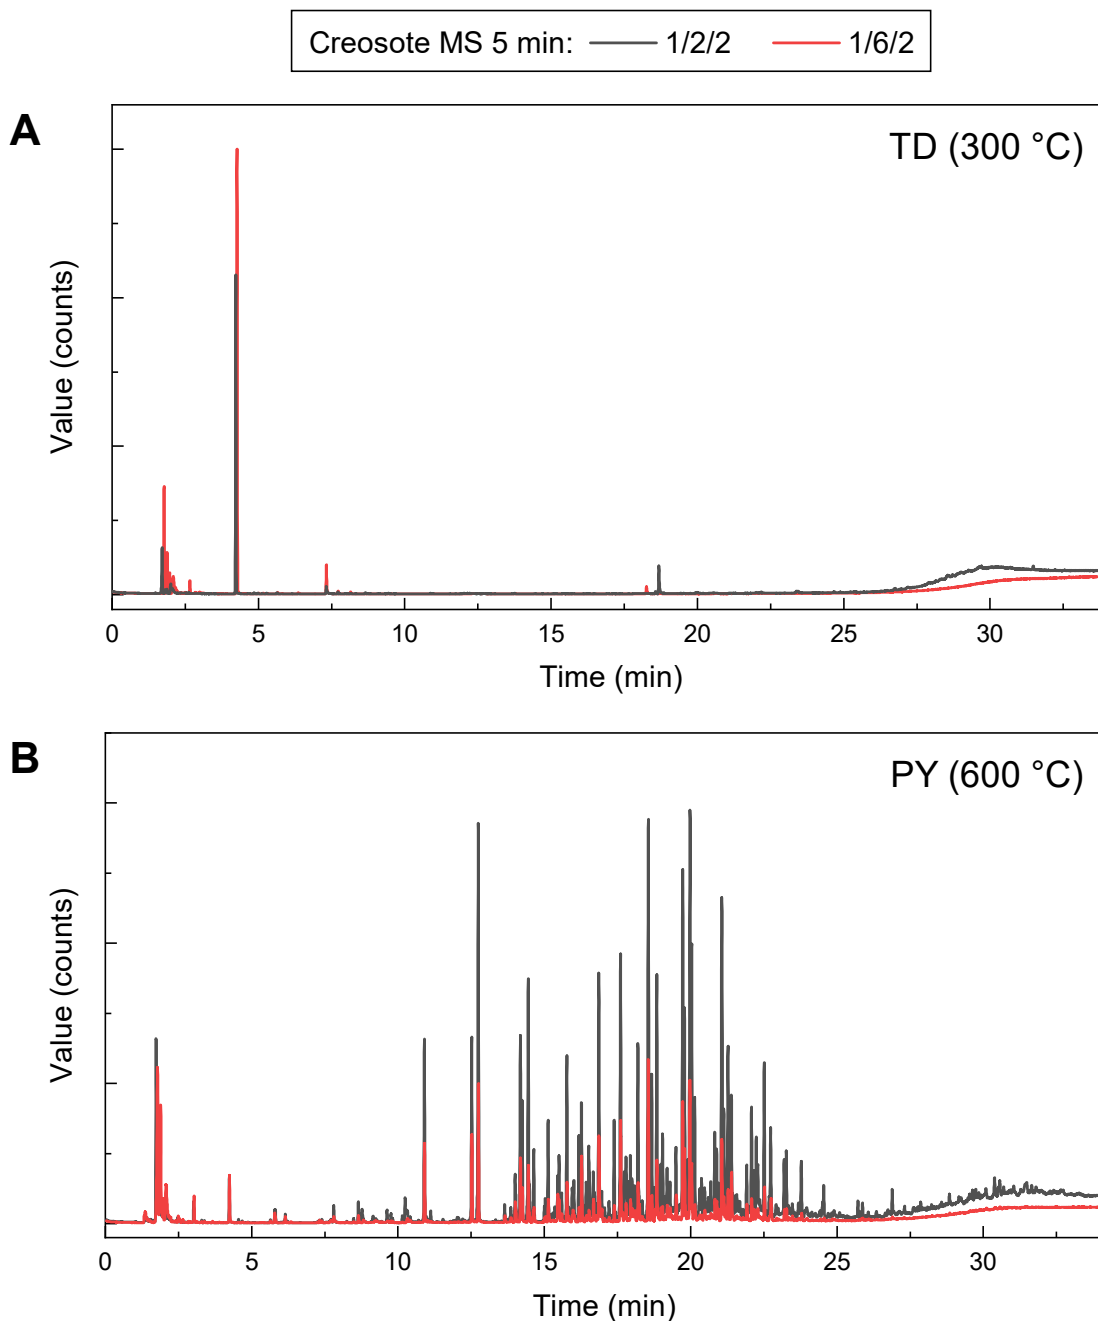

**Figure S3.** Chromatograms from TP-PY-GC/MS analysis for creosote MS 5 min 1/2/2 and 1/6/2 at (A) 300 °C and (B) 600 °C. For comparison, the 1/6/2 chromatograms were normalized by a factor of 0.756, which is the ratio of the sample sizes used for 1/2/2 and 1/6/2 samples.

**Table S10.** TP-GC/MS decomposition products for creosote MS 5 min 1/2/2 at 300 °C.

| <b>Creosote MS 5 min 1/2/2</b> |                          |
|--------------------------------|--------------------------|
| <b>Compound</b>                | <b>Relative area (%)</b> |
| Carbon dioxide                 | 11.48                    |
| Ethanol                        | 6.61                     |
| Toluene                        | 69.58                    |
| Benzaldehyde                   | 2.71                     |
| Anthracene                     | 9.61                     |

**Table S11.** PY-GC/MS decomposition products for creosote MS 5 min 1/2/2 at 600 °C.

| Creosote MS 5 min 1/2/2                                |                   |
|--------------------------------------------------------|-------------------|
| Compound                                               | Relative area (%) |
| Carbon dioxide                                         | 1.76              |
| Propane                                                | 0.19              |
| Sulfur dioxide                                         | 0.44              |
| Cyclopropyl carbinol                                   | 0.33              |
| Toluene                                                | 0.37              |
| Benzene                                                | 0.16              |
| Benzene, C2-                                           | 0.20              |
| Benzene, C3-                                           | 0.32              |
| Phenol, C1-                                            | 0.22              |
| Phenol, C2-                                            | 0.40              |
| Phenol, C3-                                            | 0.12              |
| Naphthalene                                            | 1.80              |
| Naphthalene, C1-                                       | 6.40              |
| Naphthalene, C2-                                       | 7.61              |
| Naphthalene, C3-                                       | 5.11              |
| Naphthalene, C4-                                       | 1.24              |
| Biphenyl                                               | 0.16              |
| Biphenyl, C2-                                          | 1.08              |
| Biphenyl, C4-                                          | 0.73              |
| 1,1'-Biphenyl, C1-                                     | 1.13              |
| 1,1'-Biphenyl, C2-                                     | 0.67              |
| Acenaphthene                                           | 0.24              |
| Dibenzofuran                                           | 0.48              |
| Fluorene                                               | 1.44              |
| 1-Isopropenylnaphthalene                               | 0.46              |
| 9H-Fluorene-3-ol                                       | 0.39              |
| 9H-Fluorene, C1-                                       | 4.21              |
| 9H-Fluorene, C2-                                       | 0.43              |
| 9H-Xanthene                                            | 2.82              |
| 6H-Dibenzo[b,d]-pyran                                  | 0.26              |
| Naphtho[2,1-b]furan, 1,2-dimethyl-                     | 2.02              |
| Phenanthrene                                           | 4.82              |
| Anthracene                                             | 1.40              |
| Acridine                                               | 0.22              |
| Anthracene, 9,10-dihydro-2-methyl-                     | 2.41              |
| 4-Phenanthrenol, 1,2,3,4-tetrahydro-4-methyl-          | 0.85              |
| Dibenzothiophene, C1-                                  | 0.98              |
| Dibenzothiophene, C2-                                  | 0.24              |
| Anthracene / Phenanthrene, C1-                         | 15.45             |
| Anthracene / Phenanthrene, C2-                         | 10.06             |
| Anthracene / Phenanthrene, C3-                         | 3.02              |
| Acenaphthylene, C4-                                    | 1.19              |
| Fluoranthene                                           | 1.18              |
| Pyrene                                                 | 0.48              |
| Pyrene, C2-                                            | 1.22              |
| Fluoranthene / Pyrene, C1-                             | 3.46              |
| Retene                                                 | 0.59              |
| 7,12-Dihydro-2-methylbenz[a]anthracene                 | 0.16              |
| Naphthalene, 1,1'-methylenebis-                        | 0.14              |
| 9,10-(1,2-Benzo)anthracene, 2,3-dimethyl-9,10-dihydro- | 0.22              |

**Table S12.** TD-GC/MS decomposition products for creosote MS 5 min 1/6/2 at 300 °C.

| <b>Creosote MS 5 min 1/6/2</b> |                          |
|--------------------------------|--------------------------|
| <b>Compound</b>                | <b>Relative area (%)</b> |
| Carbon dioxide                 | 8.78                     |
| Chloromethane                  | 1.68                     |
| Acetaldehyde                   | 3.06                     |
| Ethyl Chloride                 | 1.33                     |
| Ethanol                        | 6.38                     |
| Ethyl Acetate                  | 1.28                     |
| Toluene                        | 68.92                    |
| Benzaldehyde                   | 3.93                     |
| Benzyl chloride                | 0.25                     |
| Dibenzothiophene               | 1.20                     |
| Anthracene                     | 0.32                     |

**Table S13.** PY-GC/MS decomposition products for creosote MS 5 min 1/2/2 at 600 °C.

| <b>Creosote MS 5 min 1/2/2</b>                |                          |
|-----------------------------------------------|--------------------------|
| <b>Compound</b>                               | <b>Relative area (%)</b> |
| Carbon dioxide                                | 7.11                     |
| Sulfur dioxide                                | 1.76                     |
| Acetaldehyde                                  | 2.52                     |
| Ethyl Chloride                                | 0.35                     |
| Ethanol                                       | 2.64                     |
| Methyl vinyl ketone                           | 0.15                     |
| Benzene                                       | 0.52                     |
| Toluene                                       | 1.14                     |
| Benzene, C2-                                  | 0.58                     |
| Benzene, C3-                                  | 0.52                     |
| Phenol, C1-                                   | 0.16                     |
| Naphthalene                                   | 2.36                     |
| Naphthalene, C1-                              | 6.68                     |
| Naphthalene, C2-                              | 6.32                     |
| Naphthalene, C3-                              | 3.52                     |
| Naphthalene, C4-                              | 0.74                     |
| Biphenyl                                      | 0.19                     |
| Biphenyl, C2-                                 | 0.32                     |
| Acenaphthylene                                | 0.27                     |
| Acenaphthylene, C4-                           | 0.64                     |
| 1,1'-Biphenyl, C1-                            | 0.88                     |
| 1,1'-Biphenyl, C2-                            | 0.51                     |
| 1,1'-Biphenyl, C4-                            | 0.77                     |
| Acenaphthene                                  | 0.18                     |
| Dibenzofuran                                  | 0.77                     |
| Fluorene                                      | 2.12                     |
| 1-Isopropenyl-naphthalene                     | 0.17                     |
| 9H-Fluoren-3-ol                               | 0.66                     |
| 9H-Fluorene, C1-                              | 4.18                     |
| 9H-Fluorene, C2-                              | 0.40                     |
| 9H-Xanthene                                   | 2.87                     |
| 6H-Dibenzo[b,d]-pyran                         | 0.43                     |
| Naphtho[2,1-b]furan, 1,2-dimethyl-            | 1.17                     |
| Phenanthrene                                  | 5.34                     |
| Anthracene                                    | 1.03                     |
| Anthracene / Phenanthrene, C1-                | 12.87                    |
| Anthracene / Phenanthrene, C2-                | 6.51                     |
| Anthracene / Phenanthrene, C3-                | 2.96                     |
| Acridine                                      | 0.37                     |
| Anthracene, 9,10-dihydro-2-methyl-            | 1.91                     |
| 4-Phenanthrenol, 1,2,3,4-tetrahydro-4-methyl- | 0.44                     |
| Dibenzothiophene, C1-                         | 1.18                     |
| Dibenzothiophene, C2-                         | 0.12                     |
| Fluoranthene                                  | 1.48                     |
| Pyrene                                        | 0.63                     |
| Pyrene, C2-                                   | 0.80                     |
| Fluoranthene / Pyrene, C1-                    | 2.51                     |
| Retene                                        | 0.37                     |

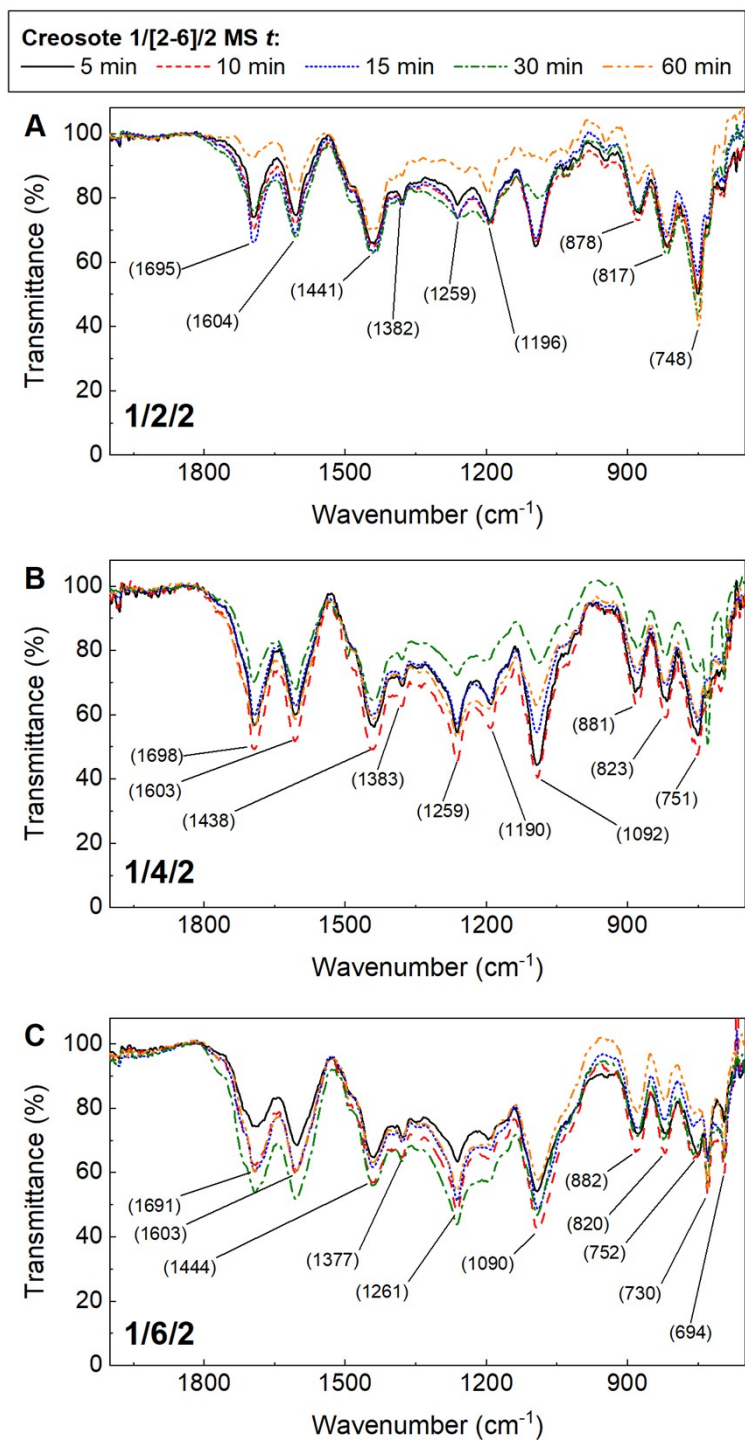

**Figure S4.** FTIR spectra of creosote-derived HCPs synthesized by MS using a precursor/catalyst/crosslinker molar ratio of: (A) 1/2/2, (B) 1/4/2, and (C) 1/6/2.

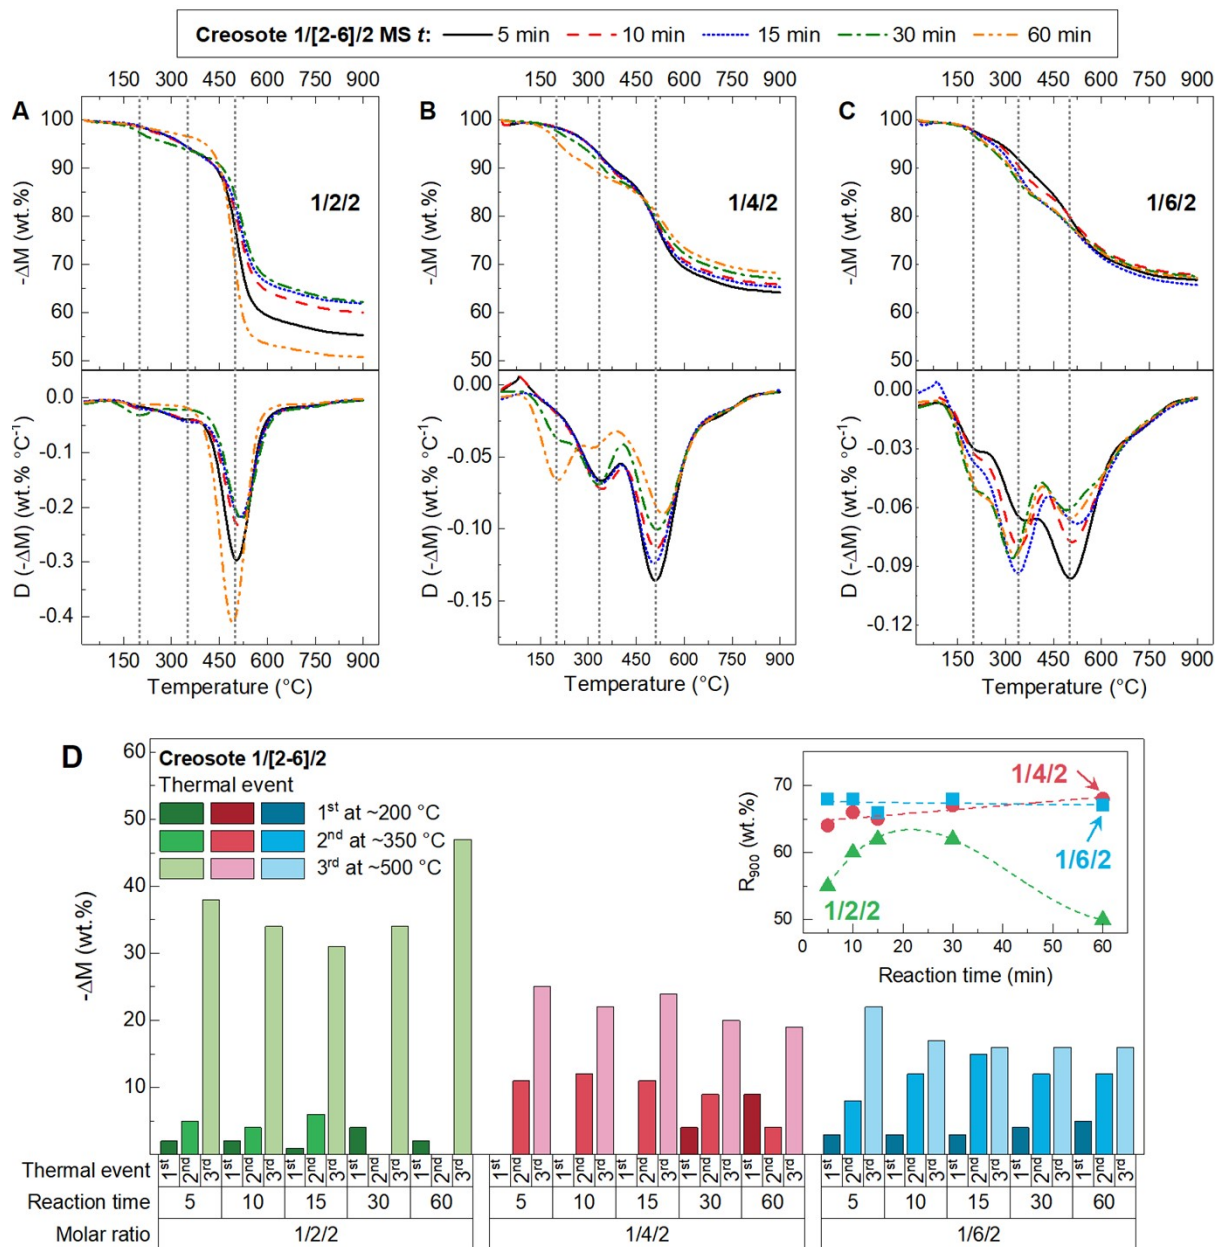

**Figure S5.** TG analysis of creosote-derived HCPs obtained using different catalyst contents (1/[2-6]/2 molar ratio) and reaction times (5 – 60 min): (A - C) Mass loss,  $-\Delta M$ , and its derivative,  $D(-\Delta M)$ , curves; (D)  $-\Delta M$  for each thermal event and (D, inset) final residual weight fraction at 900 °C,  $R_{900}$ . The temperatures of the thermal events in (D) are given for reference, the exact values for each case are reported in Table S9.

**Table S14.** TG analysis of creosote-derived HCPs prepared by MS using a planetary mill. Each thermal event is identified by its onset and end temperature ( $T_{\text{onset}}$  and  $T_{\text{end}}$ , respectively), as well as by the temperature at which maximum mass loss occurs during the corresponding event ( $T_{\text{max}}$ ). The total mass loss at each thermal event and the final residue at 900 °C are also reported ( $-\Delta M$  and  $R_{900}$ , respectively).

| Sample                    | $T_{\text{max}}$<br>(°C) | $T_{\text{onset}}$<br>(°C) | $T_{\text{end}}$<br>(°C) | $-\Delta M$<br>(wt.%) | $R_{900}$<br>(wt.%)* |
|---------------------------|--------------------------|----------------------------|--------------------------|-----------------------|----------------------|
| Creosote 1/2/2 MS 5min    | 203                      | 119                        | 259                      | 2                     | 55                   |
|                           | 344                      | 259                        | 374                      | 5                     |                      |
|                           | 504                      | 374                        | 900                      | 38                    |                      |
| Creosote 1/2/2 MS 10min   | 204                      | 99                         | 254                      | 2                     | 60                   |
|                           | 354                      | 254                        | 369                      | 4                     |                      |
|                           | 514                      | 369                        | 900                      | 34                    |                      |
| Creosote 1/2/2 MS 15min   | 214                      | 124                        | 254                      | 1                     | 62                   |
|                           | 354                      | 254                        | 384                      | 6                     |                      |
|                           | 519                      | 384                        | 900                      | 31                    |                      |
| Creosote 1/2/2 MS 30min   | 204                      | 94                         | 279                      | 4                     | 62                   |
|                           | 519                      | 279                        | 900                      | 34                    |                      |
|                           | 199                      | 109                        | 239                      | 2                     |                      |
| Creosote 1/2/2 MS 60min   | 494                      | 239                        | 900                      | 47                    | 50                   |
|                           | 339                      | 84                         | 404                      | 11                    |                      |
|                           | 509                      | 404                        | 900                      | 25                    |                      |
| Creosote 1/4/2 MS 5min    | 344                      | 84                         | 409                      | 12                    | 66                   |
|                           | 514                      | 409                        | 900                      | 22                    |                      |
|                           | 339                      | 119                        | 404                      | 11                    |                      |
| Creosote 1/4/2 MS 10min   | 509                      | 404                        | 900                      | 24                    | 65                   |
|                           | 214                      | 94                         | 239                      | 4                     |                      |
|                           | 334                      | 239                        | 409                      | 9                     |                      |
| Creosote 1/4/2 MS 15min   | 514                      | 409                        | 900                      | 20                    | 67                   |
|                           | 204                      | 89                         | 284                      | 9                     |                      |
|                           | 314                      | 284                        | 389                      | 4                     |                      |
| Creosote 1/4/2 MS 30min   | 534                      | 389                        | 900                      | 19                    | 68                   |
|                           | 211                      | 90                         | 242                      | 3                     |                      |
|                           | 360                      | 242                        | 394                      | 8                     |                      |
| Creosote 1/6/2 MS 5min    | 503                      | 394                        | 900                      | 22                    | 67                   |
|                           | 207                      | 93                         | 229                      | 3                     |                      |
|                           | 342                      | 229                        | 423                      | 12                    |                      |
| Creosote 1/6/2 MS 10min   | 510                      | 423                        | 900                      | 17                    | 68                   |
|                           | 200                      | 85                         | 231                      | 3                     |                      |
|                           | 337                      | 231                        | 436                      | 15                    |                      |
| Creosote 1/6/2 MS 15min   | 525                      | 436                        | 900                      | 16                    | 66                   |
|                           | 217                      | 90                         | 228                      | 4                     |                      |
|                           | 320                      | 228                        | 409                      | 12                    |                      |
| Creosote 1/6/2 MS 30min   | 493                      | 409                        | 900                      | 16                    | 68                   |
|                           | 214                      | 83                         | 242                      | 5                     |                      |
|                           | 332                      | 242                        | 418                      | 12                    |                      |
| Creosote 1/6/2 MS 60min   | 500                      | 418                        | 900                      | 16                    | 67                   |
|                           | 219                      | 109                        | 259                      | 5                     |                      |
|                           | 324                      | 259                        | 379                      | 6                     |                      |
| Creosote 1/6/1 MS 30min   | 499                      | 379                        | 900                      | 18                    | 71                   |
|                           | 204                      | 104                        | 264                      | 4                     |                      |
|                           | 324                      | 264                        | 359                      | 4                     |                      |
| Creosote 1/6/0.5 MS 30min | 504                      | 359                        | 654                      | 17                    | 73                   |
|                           | 724                      | 654                        | 900                      | 2                     |                      |
|                           | 179                      | 109                        | 204                      | 1                     |                      |
| Creosote 1/6/0 MS 30min   | 274                      | 204                        | 329                      | 3                     | 74                   |
|                           | 469                      | 329                        | 644                      | 18                    |                      |
|                           | 730                      | 644                        | 900                      | 4                     |                      |

\* Residual weight fraction at 900 °C from TG analysis in inert atmosphere.

**Table S15.** Elemental analysis of creosote-derived HCPs prepared by MS for 30 min reaction time.

| Sample                  | N (wt.%) | C (wt.%) | H (wt.%) | S (wt.%) | O (wt.%) |
|-------------------------|----------|----------|----------|----------|----------|
| Creosote 1/2/2 MS 30min | 0.3      | 87.8     | 5.2      | 0.4      | 6.9      |
| Creosote 1/4/2 MS 30min | 0.3      | 80.9     | 4.8      | 0.4      | 9.1      |
| Creosote 1/6/2 MS 30min | 0.3      | 77.2     | 4.3      | 0.3      | 10.3     |

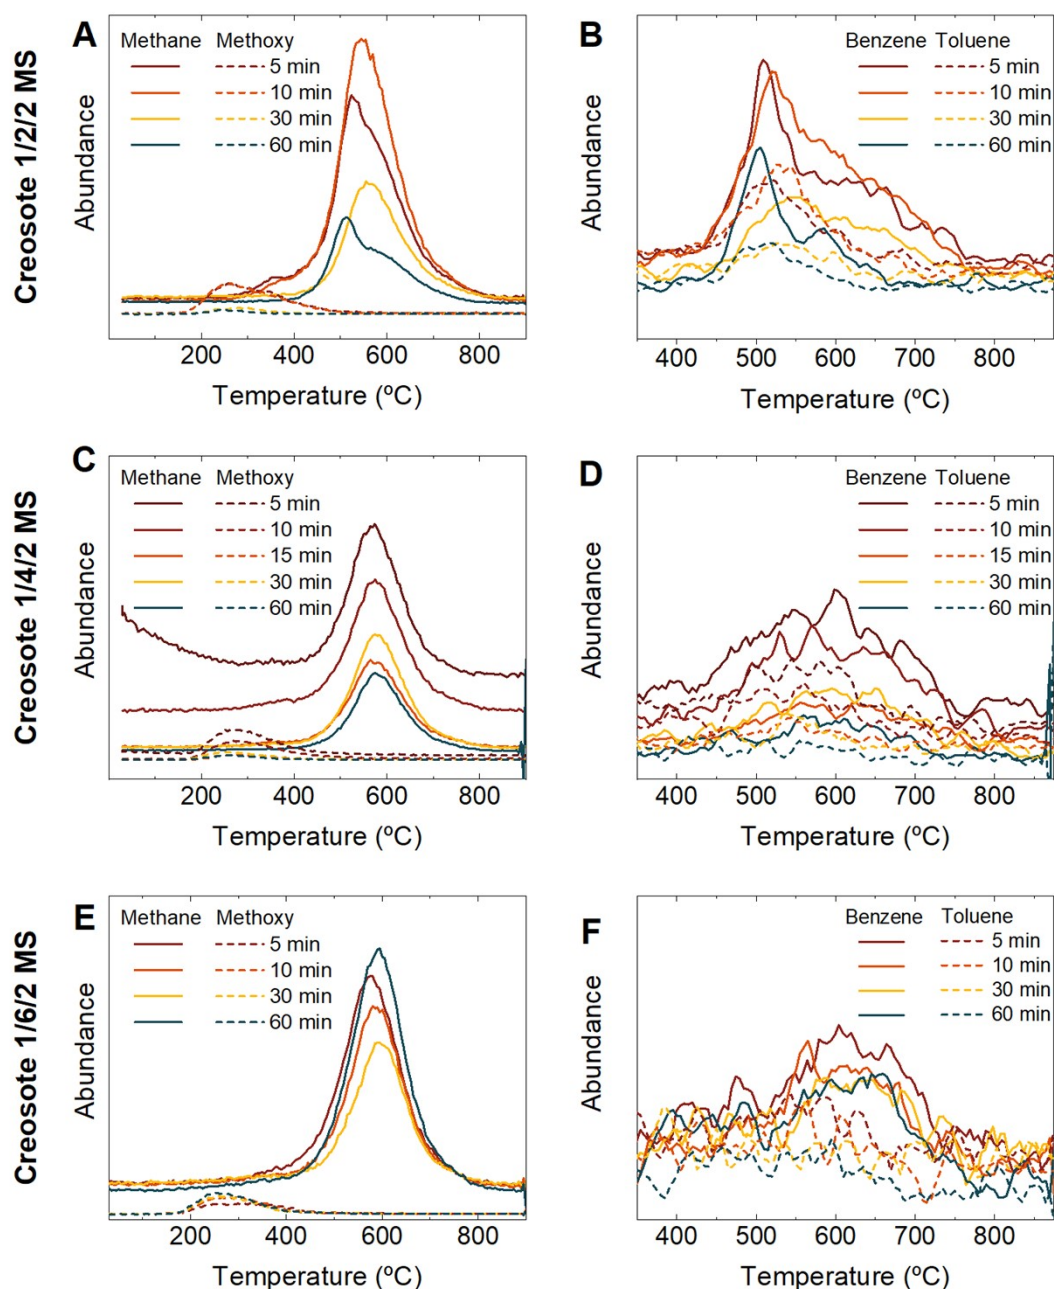

**Figure S6.** MaSp spectra for the release of (A, C, E) methane and methoxy moieties, (B, D, E) benzene and toluene moieties for creosote-derived HCPs prepared by MS using precursor/catalyst/crosslinker molar ratios of: (A, B) 1/2/2, (C, D) 1/4/2, and (E, F) 1/6/2.

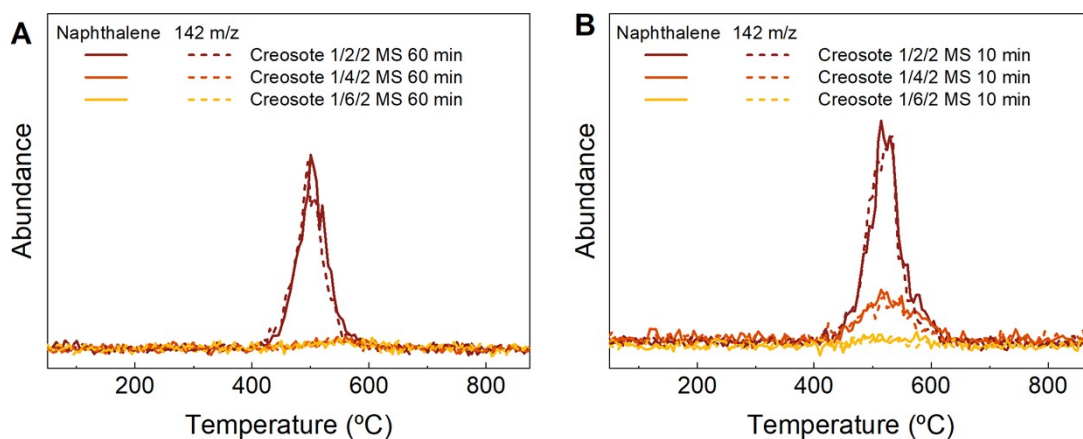

**Figure S7.** MaSp spectra for the release of naphthalene and 142 m/z moieties for creosote-derived HCPs using 1/[2 – 6]/2 precursor/catalyst/crosslinker molar ratios and a reaction time of: (A) 60 min, and (B) 10 min.

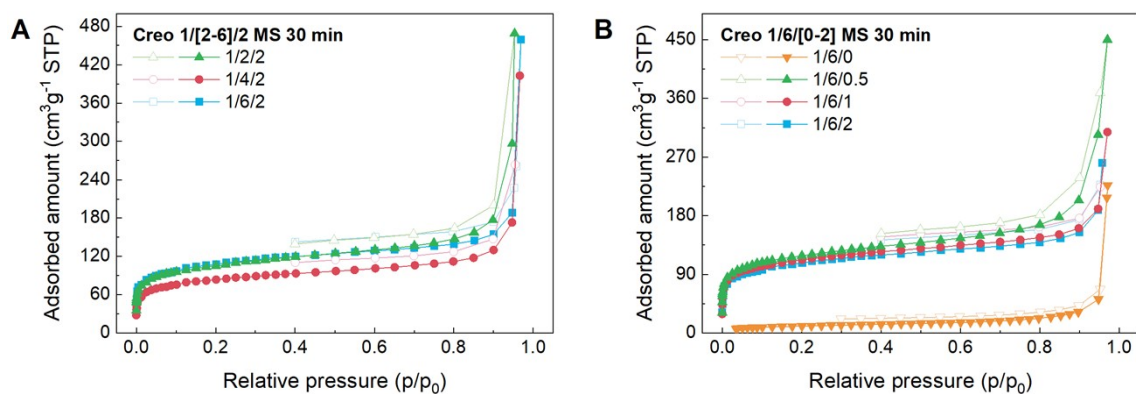

**Figure S8.** N<sub>2</sub> adsorption-desorption isotherms of creosote-derived HCPs obtained using different (A) catalyst (1/[2-6]/2) and (B) crosslinker contents and a reaction time of 30 min.

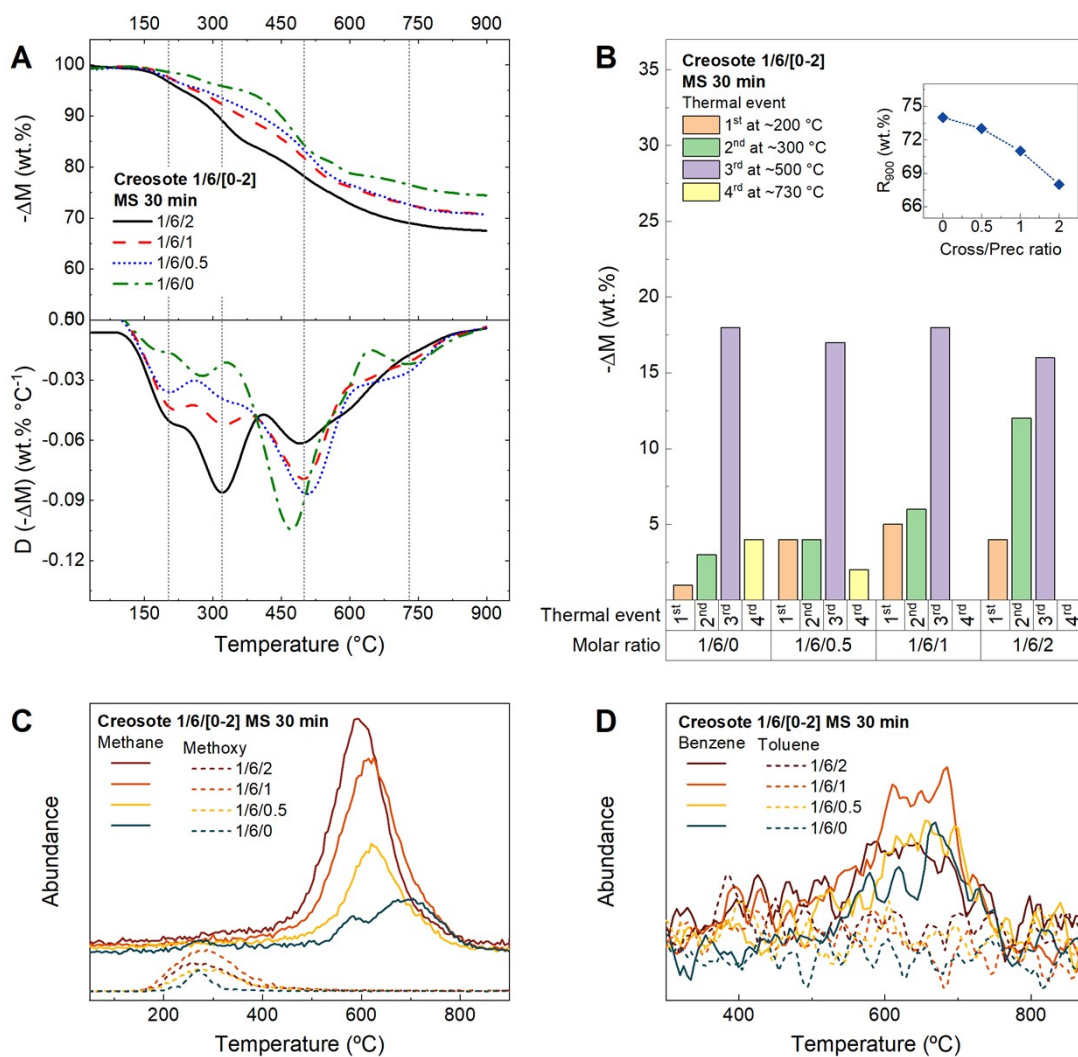

**Figure S9.** (A) TG analysis (mass loss and its derivative) and (B)  $-\Delta M$  during each thermal event, (B inset)  $R_{900}$  observed during TG analysis. MaSp spectra for the release of (C) methane and methoxy moieties and (D) benzene and toluene moieties of creosote-derived HCPs obtained by MS using 1/6/[0-2] precursor/catalyst/crosslinker molar ratios.

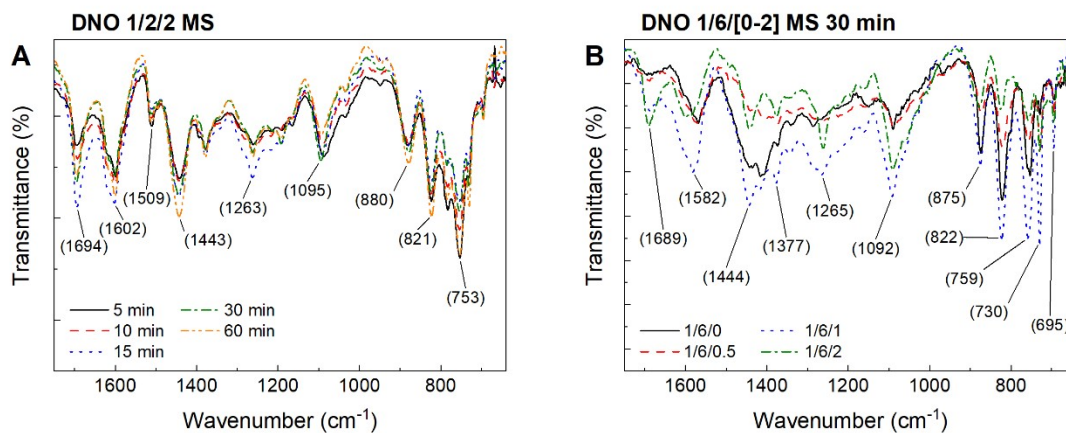

**Figure S10.** FTIR spectra of DNO-derived HCPs prepared by MS with: (A) 1/2/2 molar ratio and different reaction times (DNO 1/2/2 MS), and (B) different crosslinker contents and 30 min reaction time (DNO 1/6/[0-2]).

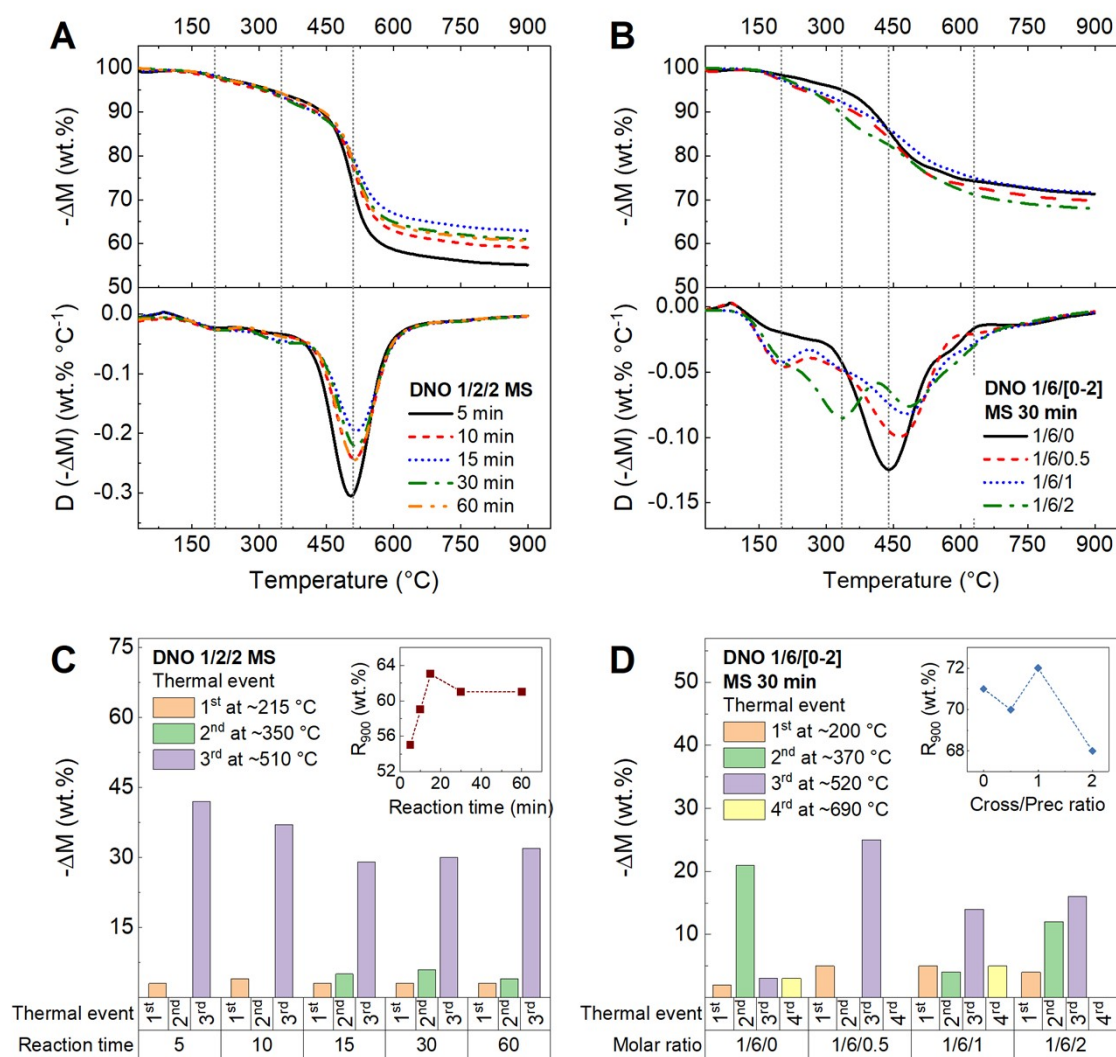

**Figure S11.** (A, B) Mass loss,  $-\Delta M$ , during each thermal event and (A,B insets) final residual weight fraction at 900 °C,  $R_{900}$ , observed during TG analysis of DNO-derived HCPs obtained by MS: (A) 1/2/2 molar ratio and different reaction times (DNO 1/2/2 MS), and (B) different crosslinker contents and 30 min reaction time (DNO 1/6/[0-2]). The temperatures of the thermal events in (A) and (B) are given for reference; the exact values for each case are reported in Table S11.

**Table S16.** TG analysis of DNO-derived HCPs prepared by MS using a planetary mill. Each thermal event is identified by its onset and end temperature ( $T_{\text{onset}}$  and  $T_{\text{end}}$ , respectively), as well as by the temperature at which the maximum mass loss occurs during the corresponding event ( $T_{\text{max}}$ ). The total mass loss at each thermal event and the final residue at 900 °C are also reported ( $-\Delta M$  and  $R_{900}$ , respectively).

| Sample               | $T_{\text{max}}$<br>(°C) | $T_{\text{onset}}$<br>(°C) | $T_{\text{end}}$<br>(°C) | $-\Delta M$<br>(wt.%) | $R_{900}$<br>(wt.%)* |
|----------------------|--------------------------|----------------------------|--------------------------|-----------------------|----------------------|
| DNO 1/2/2 MS 5min    | 201                      | 91                         | 261                      | 3                     | 55                   |
|                      | 504                      | 261                        | 900                      | 42                    |                      |
| DNO 1/2/2 MS 10min   | 212                      | 95                         | 270                      | 4                     | 59                   |
|                      | 512                      | 270                        | 900                      | 37                    |                      |
| DNO 1/2/2 MS 15min   | 234                      | 95                         | 262                      | 3                     | 63                   |
|                      | 349                      | 262                        | 386                      | 5                     |                      |
| DNO 1/2/2 MS 30min   | 516                      | 386                        | 900                      | 29                    | 61                   |
|                      | 219                      | 113                        | 264                      | 3                     |                      |
| DNO 1/2/2 MS 60min   | 354                      | 264                        | 397                      | 6                     | 61                   |
|                      | 516                      | 397                        | 900                      | 30                    |                      |
| DNO 1/6/2 MS 30min   | 215                      | 111                        | 264                      | 3                     | 68                   |
|                      | 349                      | 264                        | 377                      | 4                     |                      |
| DNO 1/6/1 MS 30min   | 513                      | 377                        | 900                      | 32                    | 72                   |
|                      | 202                      | 89                         | 243                      | 4                     |                      |
| DNO 1/6/0.5 MS 30min | 335                      | 243                        | 413                      | 12                    | 70                   |
|                      | 490                      | 413                        | 900                      | 16                    |                      |
| DNO 1/6/0 MS 30min   | 204                      | 90                         | 261                      | 5                     | 71                   |
|                      | 336                      | 261                        | 366                      | 4                     |                      |
| DNO 1/6/0 MS 30min   | 480                      | 366                        | 592                      | 14                    | 71                   |
|                      | 628                      | 592                        | 900                      | 5                     |                      |
| DNO 1/6/0 MS 30min   | 206                      | 86                         | 265                      | 5                     | 71                   |
|                      | 463                      | 265                        | 900                      | 25                    |                      |
| DNO 1/6/0 MS 30min   | 170                      | 88                         | 243                      | 2                     | 71                   |
|                      | 440                      | 243                        | 551                      | 21                    |                      |
| DNO 1/6/0 MS 30min   | 599                      | 551                        | 660                      | 3                     | 71                   |
|                      | 755                      | 660                        | 900                      | 3                     |                      |

\* Residual weight fraction at 900 °C from TG analysis in inert atmosphere.

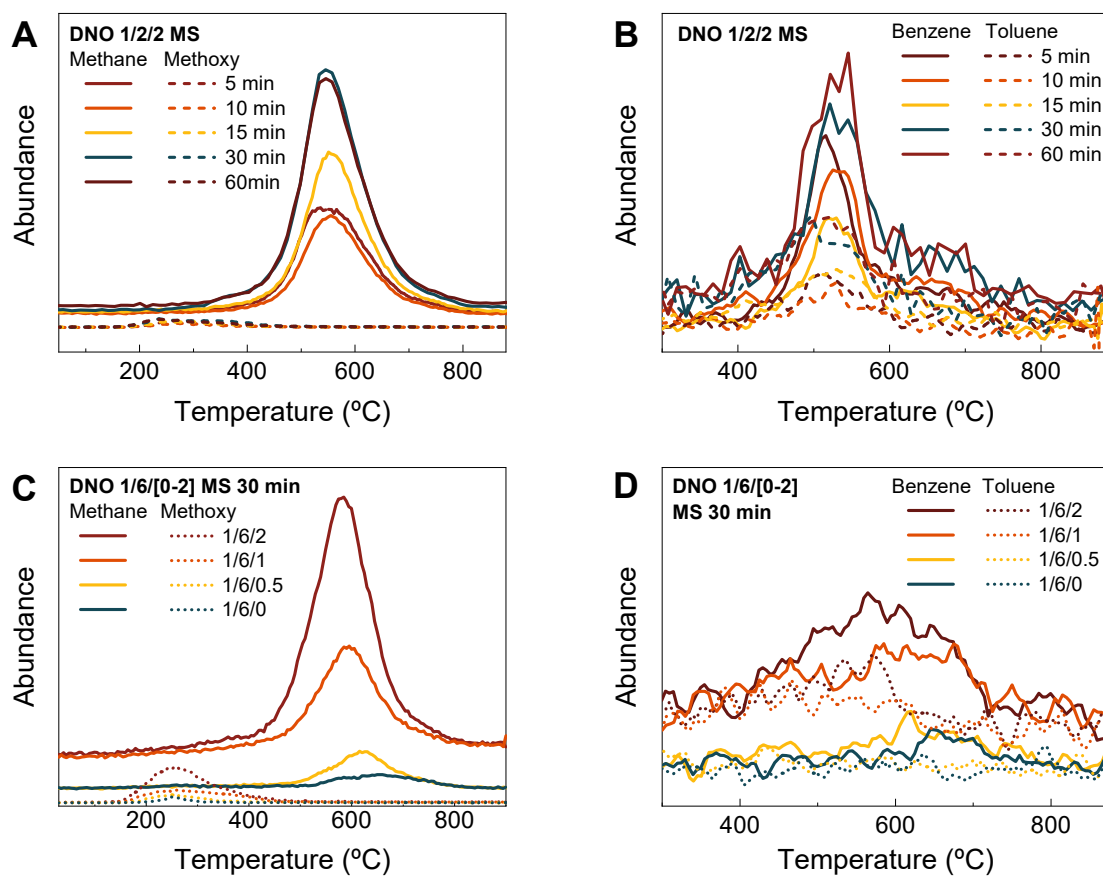

**Figure S12.** MaSp spectra for the release of: (A, B) methane and methoxy moieties, (C, D) benzene and toluene moieties of (A, B) DNO 1/2/2, and (C, D) DNO 1/6/[0-2] series of MS-based HCPs.

**Table S17.**  $A_{\text{BET}}$  and MB adsorption capacity of the tested HCPs from this study and those of other HCPs reported in the literature.

| Sample                                              | Precursor                                          | $A_{\text{BET}}$<br>( $\text{m}^2 \text{g}^{-1}$ ) | MB adsorption<br>( $\text{mg}_{\text{MB}} \text{g}_s^{-1}$ ) | Ref.       |
|-----------------------------------------------------|----------------------------------------------------|----------------------------------------------------|--------------------------------------------------------------|------------|
| DNO 1/2/2 MS 15 min                                 | DNO                                                | 443                                                | 87                                                           | This study |
| Creosote 1/4/2 MS 60min                             | Creosote                                           | 497                                                | 102                                                          |            |
| Creosote 1/2/2 MS 5 min                             | Creosote                                           | 153                                                | 26                                                           |            |
| Creosote 1/4/2 MS 5 min                             | Creosote                                           | 165                                                | 36                                                           |            |
| Creosote 1/6/2 MS 5 min                             | Creosote                                           | 161                                                | 9                                                            |            |
| BE-XDC                                              | Benzene, p-dichloroxylylene                        | 706                                                | 105                                                          | 1          |
| CMB-CMB                                             | 4, 4'-bis-(chloromethyl)-1, 1'-biphenyl            | 1253                                               | 143                                                          |            |
| HCP-3                                               | Styrofoam                                          | 1007                                               | 106                                                          | 2          |
| AHCP-1                                              | Sodium tetraphenylboron                            | 939                                                | 120                                                          | 3          |
| TPP-PP                                              | Triptycene, pyrrole                                | 698                                                | 160                                                          | 4          |
| HCP-TPP                                             | Tris(o-phenylenedioxy)<br>cyclotriphosphazene      | 1642                                               | 505                                                          | 5          |
| HCP-TNP                                             | Tris(2, 3-naphthalenedioxy)<br>cyclotriphosphazene | 1700                                               | 409                                                          |            |
| HCP-MAH                                             | Phenyl maleic anhydride                            | 755                                                | 348                                                          | 6          |
| HCP-COOH                                            |                                                    | 332                                                | 422                                                          |            |
| HCPS-OH-1                                           | Hydroxylated polystyrene                           | 247                                                | 78                                                           | 7          |
| HCPS-OH-2                                           |                                                    | 315                                                | 75                                                           |            |
| HCPS-OH-3                                           |                                                    | 119                                                | 172                                                          |            |
| HCP <sub>TPB</sub> -COOH                            |                                                    | 720                                                | 371                                                          | 8          |
| HCP-NH <sub>2</sub>                                 | Benzylamine, benzene                               | 890                                                | 480                                                          | 9          |
| Fe <sub>3</sub> O <sub>4</sub> @HCP-NH <sub>2</sub> |                                                    | 533                                                | 580                                                          |            |
| Th-1                                                | Thiophene                                          | 43                                                 | 59                                                           | 10         |

## References

1. Zhao, L. X., Yuan, S. G., Sha, J. & Li, S. B. Hypercrosslinked Polymers Preparation VS Methylene Blue Adsorption. *MSF* **743–744**, 539–544 (2013).
2. Dong, X. *et al.* Recycling Plastic Waste for Environmental Remediation in Water Purification and CO<sub>2</sub> Capture. *ACS Appl. Polym. Mater.* **2**, 2586–2593 (2020).
3. Shen, R. *et al.* One-pot synthesis of a highly porous anionic hypercrosslinked polymer for ultrafast adsorption of organic pollutants. *Polym. Chem.* **9**, 4724–4732 (2018).
4. He, Y. *et al.* Efficient adsorption of methyl orange and methyl blue dyes by a novel triptycene-based hyper-crosslinked porous polymer. *RSC Advances* **12**, 5587–5594 (2022).
5. Xiong, G. *et al.* High porosity cyclotriphosphazene-based hyper-crosslinked polymers as efficient cationic dye MB adsorbents. *Polymer* **247**, 124787 (2022).
6. Song, S., Ai, J., Hu, A., Liao, G. & Wang, D. Synthesis of carboxyl-modified hyper-cross-linked polymers with conspicuous removal capability for various water-soluble contaminants. *Journal of Environmental Chemical Engineering* **9**, 106047 (2021).
7. Li, F. *et al.* Preparation of hyper-cross-linked hydroxylated polystyrene for adsorptive removal of methylene blue. *RSC Advances* **11**, 25551–25560 (2021).
8. Liu, K. *et al.* One-Pot Synthesis of Carboxyl-Functionalized Hyper-Cross-Linked Microporous Polymer Based on the Dual-Purpose Reagent Strategy for the Efficient Removal of Methylene Blue from Water. *ACS Appl. Polym. Mater.* **5**, 9807–9816 (2023).
9. Hu, A. *et al.* Magnetically hyper-cross-linked polymers with well-developed mesoporous: a broad-spectrum and highly efficient adsorbent for water purification. *J Mater Sci* **54**, 2712–2728 (2019).
10. Wei, J., Jia, J. & Liao, T. Highly selective adsorption of dyes by functional hypercrosslinked-polymers prepared in a facile and chemically stable manner. *Journal of Environmental Chemical Engineering* **11**, 110555 (2023).
